# Supplementary material for: MAVEN2: An Updated Open-Source Mass Spectrometry Exploration Platform
Source: Metabolites. 2022 Jul 25;12(8):684. doi: 10.3390/metabo12080684 (PMC9330773; doi:10.3390/metabo12080684)
Supplement: Supplementary file 1 [file metabolites-12-00684-s001.zip]

Archive with 11 entries (10 files):
- metabolites-1827771_proof-supplementary/
- metabolites-1827771_proof-supplementary/Dataset_S3_Metabolomics_Example_Analysis.zip
- __MACOSX/metabolites-1827771_proof-supplementary/._Dataset_S3_Metabolomics_Example_Analysis.zip
- metabolites-1827771_proof-supplementary/Supplementary_Information.pdf
- __MACOSX/metabolites-1827771_proof-supplementary/._Supplementary_Information.pdf
- metabolites-1827771_proof-supplementary/Dataset_S1_Lipidomics_Analysis.zip
- metabolites-1827771_proof-supplementary/Dataset_S5_Library_Comparisons.zip
- __MACOSX/metabolites-1827771_proof-supplementary/._Dataset_S5_Library_Comparisons.zip
- metabolites-1827771_proof-supplementary/Dataset_S4_Metabolomics_Analysis_Script.zip
- metabolites-1827771_proof-supplementary/Dataset_S2_Metabolomics_Library_Files.zip
- __MACOSX/metabolites-1827771_proof-supplementary/._Dataset_S2_Metabolomics_Library_Files.zip
